# Supplementary material
Source: MDPI journal article supplement (https://www.mdpi.com/2073-4441/11/2/189)
Supplement: s1 [file s1]

## Sheet: Sheet1
Table S1. Names and numbers of the individual districts in each of the states.
No.	Name	No.	Name	No.	Name	No.	Name	No.	Name	No.	Name	No.	Name	No.	Name	No.	Name		States
1	Chandigarh	18	Rohtak	35	Baramula	52	Gurdaspur	69	Azamgarh	86	Faizabad	103	Kanpur Dehat	120	Pratapgarh	137	Champawat		Chandigarh
2	New Delhi	19	Sirsa	36	Doda	53	Hoshiarpur	70	Baghpat	87	Farrukhabad	104	Kanpur Nagar	121	Rae Bareli	138	Dehradun		New Delhi
3	Ambala	20	Sonipat	37	Jammu	54	Jalandhar	71	Bahraich	88	Fatehpur	105	Kaushambi	122	Rampur	139	Garhwal		Hariyana
4	Bhiwani	21	Yamunanagar	38	Kargil	55	Kapurthala	72	Ballia	89	Firozabad	106	Kheri	123	Saharanpur	140	Hardwar		Jammu & Kashmir
5	Faridabad	22	Chamba	39	Kathua	56	Ludhiana	73	Balrampur	90	Gautam Buddha Nagar	107	Kushinagar	124	Sant Kabir Nagar	141	Nainital		Punjab
6	Fatehabad	23	Hamirpur	40	Kupwara	57	Mansa	74	Banda	91	Ghaziabad	108	Lalitpur	125	Sant Ravidas Nagar	142	Pithoragarh		Uttar Pradesh
7	Gurgaon	24	Kangra	41	Leh (Ladakh)	58	Moga	75	Barabanki	92	Ghazipur	109	Lucknow	126	Shahjahanpur	143	Rudraprayag		Uttaranchal/Uttaranchal
8	Hisar	25	Kinnaur	42	Pulwama	59	Muktsar	76	Bareilly	93	Gonda	110	Maharajganj	127	Shrawasti	144	Tehri Garhwal
9	Jhajjar	26	Kullu	43	Punch	60	Nawanshahr	77	Basti	94	Gorakhpur	111	Mahoba	128	Siddharthnagar	145	Udham Singh Nagar
10	Jind	27	Lahul & Spiti	44	Rajauri	61	Patiala	78	Bijnor	95	Hamirpur	112	Mainpuri	129	Sitapur	146	Uttarkashi
11	Kaithal	28	Mandi	45	Srinagar	62	Rupnagar	79	Budaun	96	Hardoi	113	Mathura	130	Sonbhadra
12	Karnal	29	Shimla	46	Udhampur	63	Sangrur	80	Bulandshahar	97	Hathras	114	Mau	131	Sultanpur
13	Kurukshetra	30	Sirmaur	47	Amritsar	64	Agra	81	Chandauli	98	Jalaun	115	Meerut	132	Unnao
14	Mahendragarh	31	Solan	48	Bathinda	65	Aligarh	82	Chitrakoot	99	Jaunpur	116	Mirzapur	133	Varanasi
15	Panchkula	32	Una	49	Faridkot	66	Allahabad	83	Deoria	100	Jhansi	117	Moradabad	134	Almora
16	Panipat	33	Anantanag	50	Fatehgarh Sahib	67	Ambedkar Nagar	84	Etah	101	Jyotiba Phule Nagar	118	Muzaffarnagar	135	Bageshwar
17	Rewari	34	Badgam	51	Firozpur	68	Auraiya	85	Etawah	102	Kannauj	119	Pilibhit	136	Chamoli
